# Supplementary material for: Tolerance to Stress Combination in Tomato Plants: New Insights in the Protective Role of Melatonin
Source: PubMed Central journal article supplement (PMC6017353; doi:10.3390/molecules23030535), 2018-02-28
Supplement: molecules-23-00535-s001.pdf [file molecules-23-00535-s001.pdf]

**Supplementary Figure 1.** Endogenous melatonin and melatonin-derivatives concentration found in tomato leaves under control, salinity, heat or the combination of salinity and heat. These plant material came from a previous experiment carried out in our research group and used in Martinez et al., (2017; Ref #6 in this manuscript)

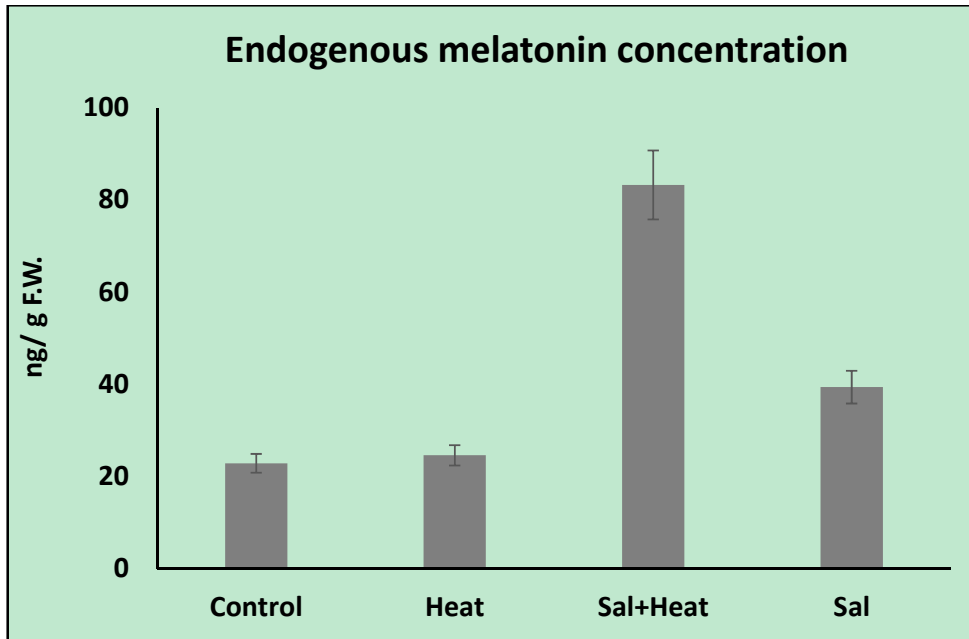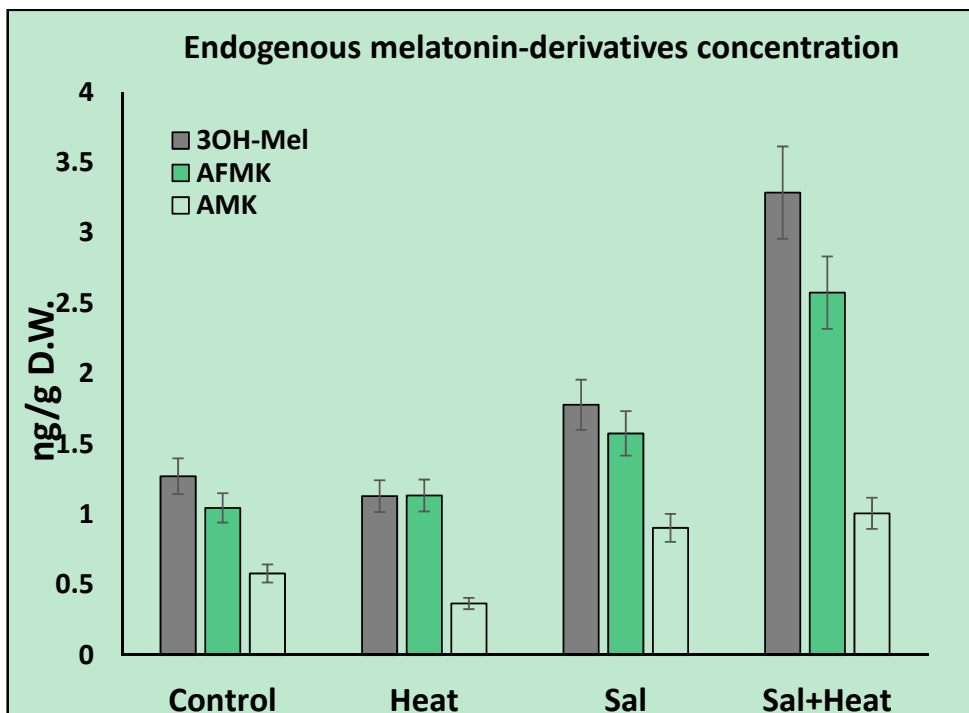

**Supplementary Table S1.** Primers used for the quantification of the expression levels of the oxidative metabolism-related transcripts by qPCR.

| Gen                | Accession (SGN) | Forward                 | Reverse                 |
|--------------------|-----------------|-------------------------|-------------------------|
| <i>SIFe-SOD</i>    | Solyc06g048410  | taaataagagactttggttcc   | tataattgcctcttaacct     |
| <i>SICu/Zn-SOD</i> | Solyc11g066390  | ggccaatcttgacccttta     | agtccaggagcaagtccagt    |
| <i>SlcAPX</i>      | Solyc06g005160  | tctgaattgggatttgctga    | cgtctaactagctgcaaaa     |
| <i>SIGR1</i>       | Solyc09g091840  | ttgggtggaactgtgttctt    | tctcattcacttccatcca     |
| <i>SICAT1</i>      | Solyc12g094620  | tgatcgcgagaagatactg     | cttccacgttcatggacaac    |
| <i>SIGST</i>       | Solyc01g086680  | tactcgtttttgggctcgtt    | caccgattcaactcctctg     |
| <i>SIMDHAR1</i>    | Solyc08g081530  | caagggttctcgttctct      | ctgcatttctctccaact      |
| <i>SIDHAR1</i>     | Solyc05g054760  | aggtggctcttggacacttc    | cttcagccttggtttctgg     |
| <i>SIPhGPX</i>     | Solyc06g073460  | tggcttgagcactacaggtg    | tttcgtaggcaggaagaag     |
| <i>SIGPX</i>       | Solyc08g080940  | acggagcaagcacaattgacaac | cgattgattcaccgcaaagctgt |
| <i>SIEF1a</i>      | Solyc11g069700  | cgtggttatgttgcctcaa     | acagcaatgtgggaagtgtg    |
| <i>SIActin</i>     | Solyc03g078400  | ggtatcgtctggactctggtg   | gggaaggcgtaacctca       |

**Supplementary Table S2.** Relative expression values of the oxidative metabolism-related transcripts. Values were normalized against *Sl18S* and *SIEF1a* as internal controls. Then, values were normalized against control samples and  $\log_2$  was calculated and represented. Values are means of  $n = 12$

| Gene             | Control | Control + MEL | S + H       | S + H + MEL |
|------------------|---------|---------------|-------------|-------------|
| <i>SICuZnSOD</i> | 0       | 0.5156233     | 2.71474     | 0.8970826   |
| <i>SIFeSOD</i>   | 0       | -0.041923046  | 1.9429268   | 1.0795378   |
| <i>SICAT1</i>    | 0       | -0.3673207    | -2.30477428 | -0.6196356  |
| <i>SlcAPX</i>    | 0       | -0.2766434    | -2.1221606  | 1.97542     |
| <i>SIDHAR1</i>   | 0       | -0.34435534   | 0.605496057 | -0.7845564  |
| <i>SIMDHAR</i>   | 0       | -0.5553976    | 3.01134936  | 2.97058697  |
| <i>SIGR1</i>     | 0       | -0.60207986   | -2.20976321 | 2.22078419  |
| <i>SIGPX</i>     | 0       | 0.34480157    | 0.6609694   | 0.4733273   |
| <i>SIGST</i>     | 0       | 0.7191284     | -1.98654586 | 1.9783079   |
| <i>SIPh-GPX</i>  | 0       | -0.73071355   | -2.07072258 | 3.74913186  |

**Supplementary Table 3.** Absolute activities of the oxidative metabolism-related enzymes. Values obtained were normalized using soluble protein content of each sample and treatment. Values are the means  $\pm$ SE (n=6).

| ENZYME   | TREATMENT |               |        |             |
|----------|-----------|---------------|--------|-------------|
|          | Control   | Control + MEL | S + H  | S + H + MEL |
| Cu/ZnSOD | 0         | 0.359         | 3.278  | 1.01        |
| FeSOD    | 0         | 0.337         | 2.157  | 1.578       |
| CAT      | 0         | -0.312        | -4.127 | -1.112      |
| cAPX     | 0         | -0.471        | -4.371 | 2.912       |
| DHAR     | 0         | -0.236        | 1.215  | -0.839      |
| MDHAR    | 0         | -0.338        | 0.927  | 1.002       |
| GR       | 0         | -0.232        | -4.231 | 3.721       |
| GPX      | 0         | -0.202        | 1.0681 | 0.992       |
| GST      | 0         | 0.365         | -2.734 | 2.007       |
| Ph-GPX   | 0         | 0.015         | -2.734 | 2.107       |

**Supplementary Table S4.** Log<sub>2</sub> of the oxidative metabolism-related enzymes. Values obtained in Supplementary Table 3 were normalized against control and log<sub>2</sub> was calculated.

| ENZYME   | TREATMENT        |                  |                  |                   |
|----------|------------------|------------------|------------------|-------------------|
|          | Control          | Control + MEL    | S + H            | S + H + MEL       |
| Cu/ZnSOD | 26.83 $\pm$ 1.01 | 34.41 $\pm$ 2.14 | 260.2 $\pm$ 3.95 | 54.03 $\pm$ 1.14  |
| FeSOD    | 8.965 $\pm$ 0.95 | 11.32 $\pm$ 0.81 | 39.98 $\pm$ 1.99 | 26.76 $\pm$ 1.57  |
| CAT      | 14.55 $\pm$ 1.10 | 11.72 $\pm$ 0.95 | 0.832 $\pm$ 0.05 | 6.731 $\pm$ 0.57  |
| cAPX     | 15.90 $\pm$ 1.21 | 11.47 $\pm$ 0.10 | 0.768 $\pm$ 0.03 | 119.6 $\pm$ 6.05  |
| DHAR     | 23.26 $\pm$ 2.03 | 19.74 $\pm$ 0.14 | 53.99 $\pm$ 1.12 | 13.01 $\pm$ 1.02  |
| MDHAR    | 0.734 $\pm$ 0.20 | 0.587 $\pm$ 0.01 | 1.397 $\pm$ 0.08 | 1.470 $\pm$ 0.07  |
| GR       | 57.54 $\pm$ 2.36 | 48.99 $\pm$ 3.45 | 3.064 $\pm$ 0.12 | 758.7 $\pm$ 19.58 |
| GPX      | 21.53 $\pm$ 1.54 | 18.71 $\pm$ 0.14 | 45.14 $\pm$ 1.14 | 42.82 $\pm$ 3.45  |
| GST      | 22.65 $\pm$ 1.24 | 29.17 $\pm$ 1.25 | 3.404 $\pm$ 0.78 | 91.04 $\pm$ 4.57  |
| Ph-GPX   | 15.27 $\pm$ 0.96 | 15.42 $\pm$ 0.98 | 2.293 $\pm$ 0.54 | 65.78 $\pm$ 2.14  |
